# Supplementary material for: Can Machine Learning Predict the Reaction Paths in Catalytic CO2 Reduction on Small Cu/Ni Clusters?
Source: MDPI journal article supplement (doi:10.3390/catal13121470), 2023-11-26
Supplement: s1 [file s1]

Archive with 1 entries (1 files):
- catalysts-2721484-supplementary.pdf
