# Supplementary material for: Can Machine Learning Predict the Reaction Paths in Catalytic CO2 Reduction on Small Cu/Ni Clusters?
Source: MDPI journal article supplement (doi:10.3390/catal13121470), 2023-11-26
Supplement: s1 [file s1 › catalysts-2721484-supplementary.pdf]

# Can Machine Learning predict the reaction paths in catalytic CO<sub>2</sub> reduction on small Cu/Ni clusters?

Rafał Stottko <sup>1</sup>,  
Elżbieta Dziadyk-Stopyra <sup>1</sup>,  
Bartłomiej M. Szyja <sup>1,\*</sup>

<sup>1</sup> Faculty of Chemistry  
Wrocław University of Science and Technology  
Gdańska 7/9  
50-344 Wrocław  
Poland;  
email: b.m.szyja@pwr.edu.pl

## Contents

|     |                                      |   |
|-----|--------------------------------------|---|
| S.1 | Notation and markings used . . . . . | 1 |
| S.2 | Heatmap . . . . .                    | 3 |
| S.3 | Predicted energy values . . . . .    | 4 |

### S.1 Notation and markings used

A special notation was developed for the project, which facilitated the entire task. Its basis is the transformation of three-dimensional metallic clusters into a one-dimensional list of elements (see Figure 1)

This one-dimensional representation of the cluster is possible due to the omission of geometric changes in the clusters.

The complexes we studied consist of metallic clusters and small carbon reactants (CO<sub>2</sub>, HCOO, COOH). A special description of the attachment of these small structures to the clusters was also developed for this work:

1. binding mode "to the corner" meaning that the molecule is concentrated around one metal of the cluster. It is possible to uniquely identify an attachment site of this type by specifying just the atom to which the molecule is attached. However, we decided to take into account the close proximity of these atoms in addition to the atoms to which the attachment occurs, in view of which the following notation:

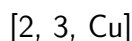

means that the molecule is bound to such a copper atom in the cluster, which in its first coordination sphere has 2 nickel atoms and 3 copper atoms.

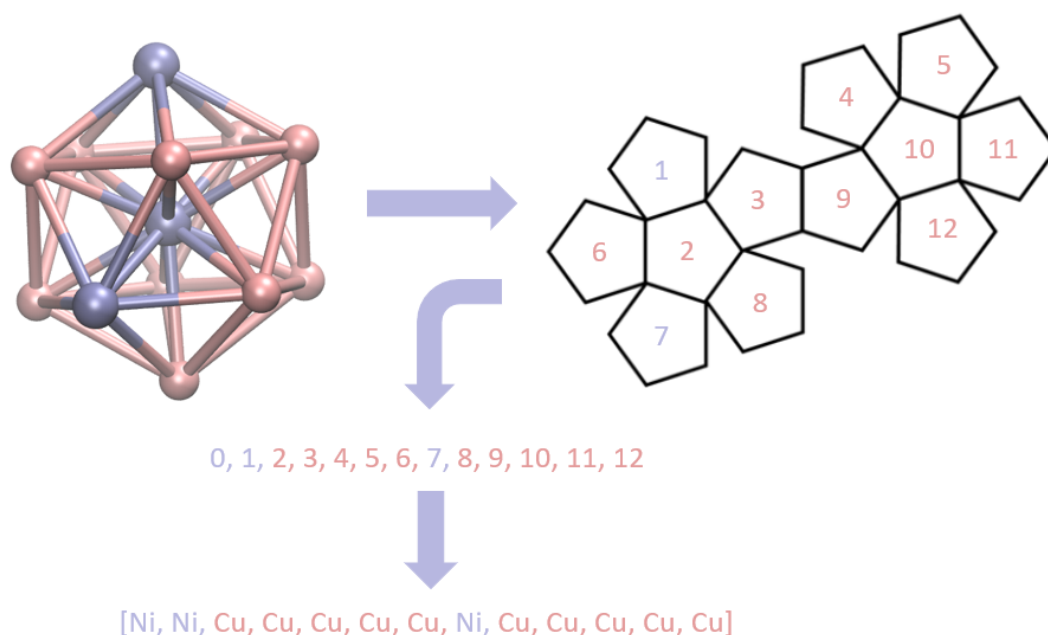

Figure S.1: Diagram for creating notation. The position of "0", where the atom that is in the center of the molecule is located, has not been plotted on the drawing on the right.

2. In the case of an "edge" binding mode, i.e. one in which the molecule bound at an area between two atoms in the cluster, we must describe the two metals in an analogous way, e.g:

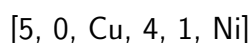

This notation means that the molecule attaches to the space between a copper atom adjacent only to nickel atoms and a nickel atom adjacent to 4 nickel atoms and one copper atom

The last boundary condition for using this notation remains. In the case where there are 2 atoms of one type and 3 atoms of the second type, we can distinguish two possibilities:

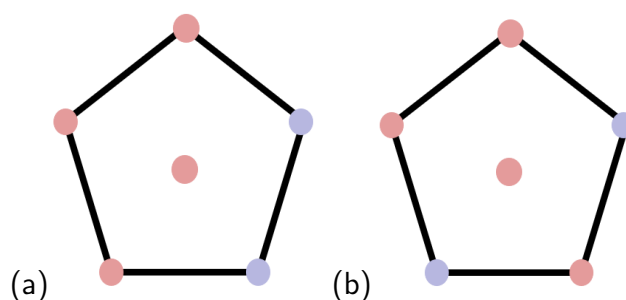

Figure S.2: A pictorial representation of the notation when there are two metals of one kind in the first coordination sphere of an atom (shown as a circle in the center of the pentagon) (atoms in the first coordination sphere are shown as circles on the vertices of the pentagon)

In this case situation from Figure S.2(a) is described as:

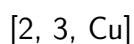

while situation from Figure S.2(b) is described as:

[2.1, 3, Cu]

The final element that we have described is the rotation of clusters. Rotations of a cluster always take place around its own axis. A rotation written in the form  $n\_m$  means that the cluster has been rotated in such a way that the atom that was initially at position  $n$  is at position 1, and the cluster that was initially at position  $m$  is at position 2 (Figure S.1).

Finally, to fully describe the cluster-agent carbon system we use the following notation:

7\_MOCMHnbond\_2\_1

Where 7 is the number describing the position of the cluster in the list of all possible cluster combinations, *MOCMHnbond* is the type of attachment of the carbon reactant to the cluster (see Figure S.1, and 2\_1 is the rotation of the cluster relative to that molecule.

## S.2 Heatmap

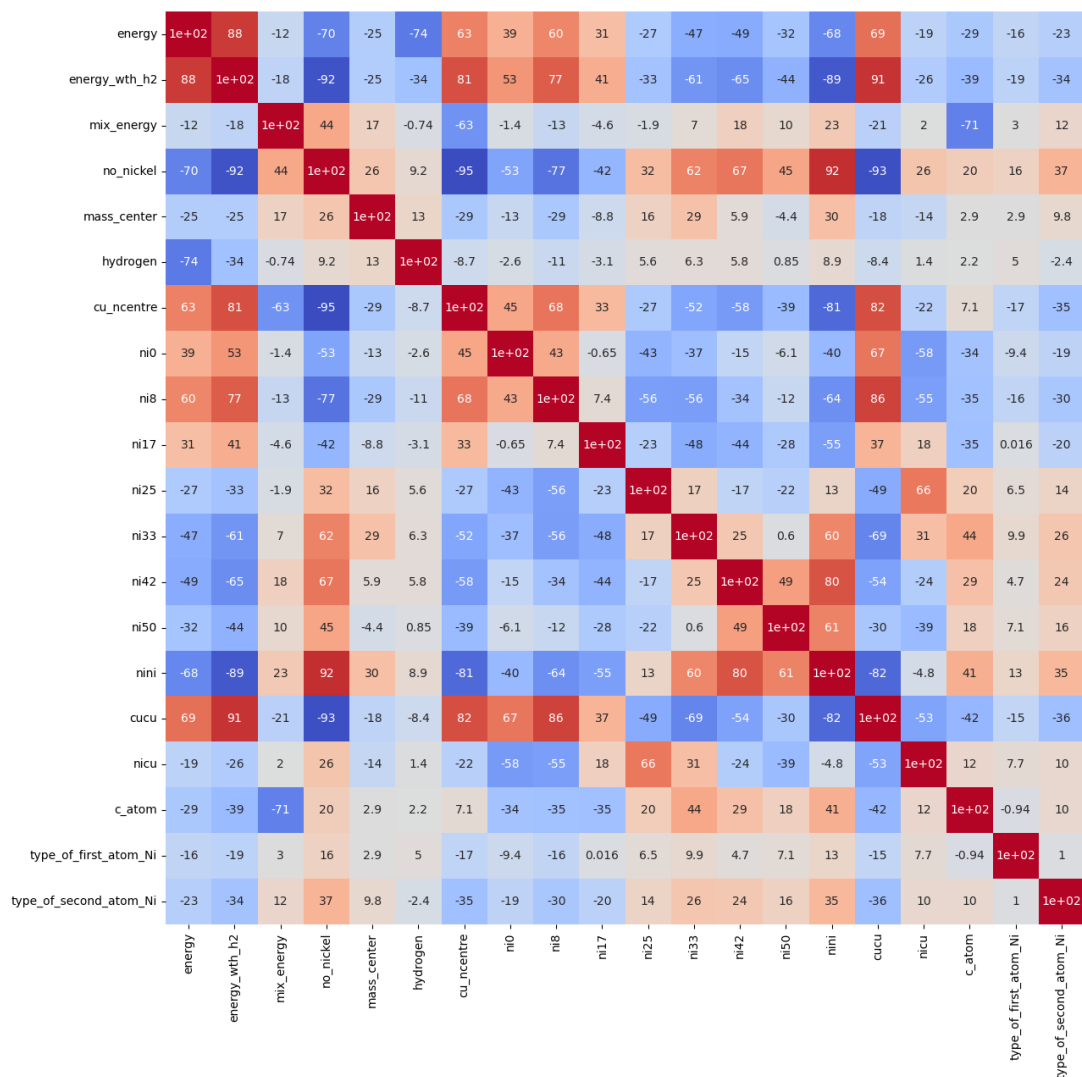

Figure S.3: Heatmap of the importance of all descriptors and all predicted values

### S.3 Predicted energy values

Table S.1: Most stable CuNi clusters for each Cu:Ni ratio and binding mode category

| number of nickel | cluster id | binding mode | predicted energy [eV] |
|------------------|------------|--------------|-----------------------|
| 1                | 1          | MC           | -62.725282            |
|                  |            | MO           | -58.350873            |
|                  |            | MOCM         | -59.369437            |
|                  |            | MOCMHnbond   | -63.215742            |
|                  |            | MOCOM        | -63.431317            |
| 2                | 3          | MC           | -64.039012            |
|                  |            | MO           | -60.352587            |
|                  |            | MOCM         | -60.722803            |
|                  |            | MOCMHnbond   | -64.540771            |
|                  |            | MOCOM        | -65.396034            |
| 3                | 9          | MC           | -65.375948            |
|                  |            | MO           | -61.675259            |
|                  |            | MOCM         | -62.094551            |
|                  |            | MOCMHnbond   | -65.889005            |
|                  |            | MOCOM        | -66.753495            |
| 4                | 19         | MC           | -66.710465            |
|                  |            | MO           | -62.995032            |
|                  |            | MOCM         | -63.463400            |
|                  |            | MOCMHnbond   | -67.234821            |
|                  |            | MOCOM        | -68.099854            |
| 5                | 43         | MC           | -68.048102            |
|                  |            | MO           | -64.320317            |
|                  |            | MOCM         | -64.837761            |
|                  |            | MOCMHnbond   | -68.583757            |
|                  |            | MOCOM        | -69.474332            |
| 6                | 71         | MC           | -69.360779            |
|                  |            | MO           | -65.618978            |
|                  |            | MOCM         | -66.185498            |
|                  |            | MOCMHnbond   | -69.907733            |
|                  |            | MOCOM        | -70.793287            |
| 7                | 128        | MC           | -70.741304            |
|                  |            | MO           | -66.986708            |
|                  |            | MOCM         | -67.602305            |
|                  |            | MOCMHnbond   | -71.299557            |
|                  |            | MOCOM        | -72.180089            |

|    |     |            |            |
|----|-----|------------|------------|
| 8  | 159 | MC         | -72.032674 |
|    |     | MO         | -68.264374 |
|    |     | MOCM       | -68.929047 |
|    |     | MOCMHnbond | -72.602226 |
|    |     | MOCOM      | -73.477737 |
| 9  | 176 | MC         | -73.395011 |
|    |     | MO         | -69.614372 |
|    |     | MOCM       | -70.328121 |
|    |     | MOCMHnbond | -73.975862 |
|    |     | MOCOM      | -74.846352 |
| 10 | 184 | MC         | -74.702397 |
|    |     | MO         | -70.90847  |
|    |     | MOCM       | -71.671295 |
|    |     | MOCMHnbond | -75.294547 |
|    |     | MOCOM      | -76.160016 |
| 11 | 188 | MC         | -76.040516 |
|    |     | MO         | -72.233638 |
|    |     | MOCM       | -73.045539 |
|    |     | MOCMHnbond | -76.643964 |
|    |     | MOCOM      | -77.504412 |
| 12 | 190 | MC         | -77.297111 |
|    |     | MO         | -73.472551 |
|    |     | MOCM       | -74.333528 |
|    |     | MOCMHnbond | -77.911858 |
|    |     | MOCOM      | -78.767285 |
